# Supplementary material for: Photoresponsive cellulose paper as a molecular printboard for covalent printing
Source: Royal Society of Chemistry journal article supplement (doi:10.1039/c7tc01081h), 2017-01-01

## Electronic Supporting Information

---

### Photoresponsive Cellulose Paper as Molecular Printboard for Covalent Printing

Jordi Rull-Barrull,<sup>a</sup> Martin d'Halluin,<sup>a</sup> Erwan Le Grogneq,<sup>a</sup> François-Xavier Felpin<sup>a,b\*</sup>

<sup>a</sup> Université de Nantes, UFR des Sciences et des Techniques, CNRS UMR 6230, CEISAM, 2 rue de la Houssinière, 44322 Nantes Cedex 3, France

<sup>b</sup> Institut Universitaire de France, 103 blvd St Michel, 75005 Paris Cedex 5, France

\*Corresponding author. Tel: (+33) 251 125 422. Email: [fx.felpin@univ-nantes.fr](mailto:fx.felpin@univ-nantes.fr)

#### Table of content

|                |       |
|----------------|-------|
| 1. Figures     | S2-S3 |
| 2. NMR spectra | S4-S7 |

## 1. Figures

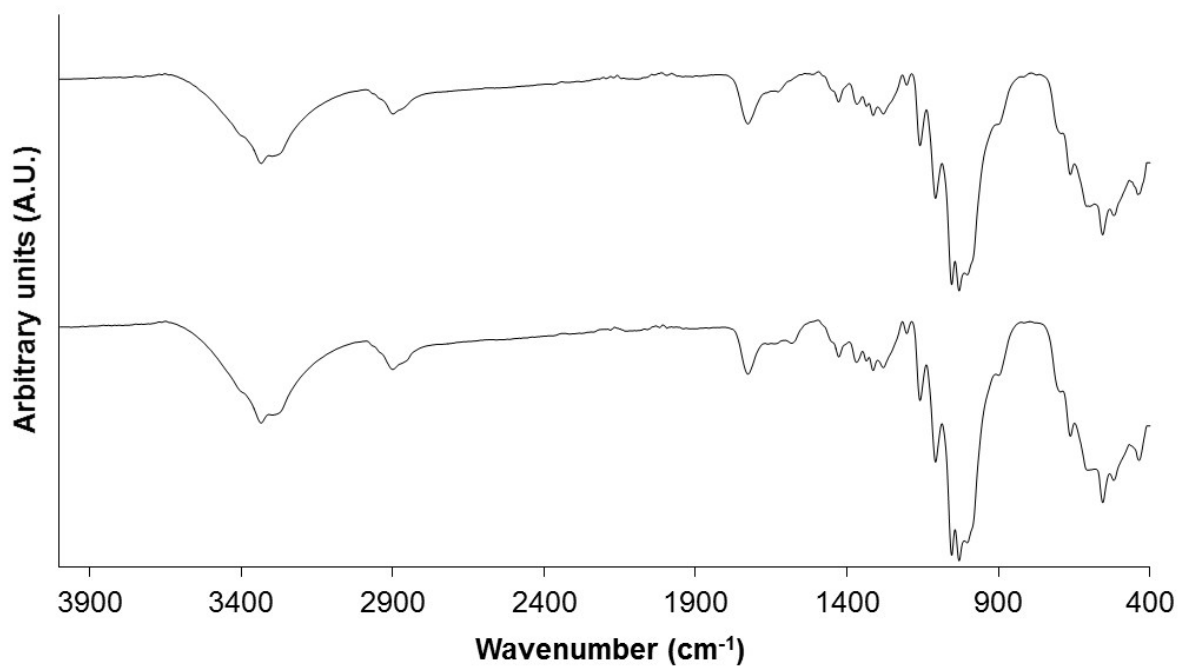

**Fig. S1** FTIR spectra of (a) **Cell-TEC** and (b) **Cell-TYC**.

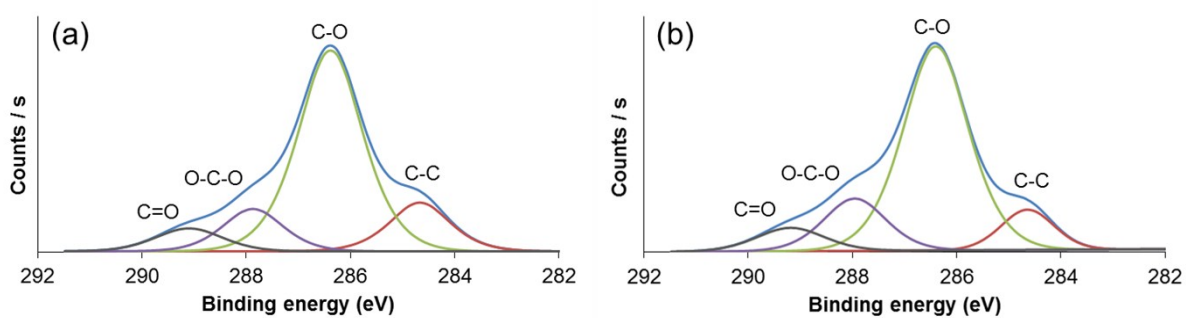

**Fig. S2** High resolution C1s spectra of (a) **Cell-TEC** and (b) **Cell-TYC**.

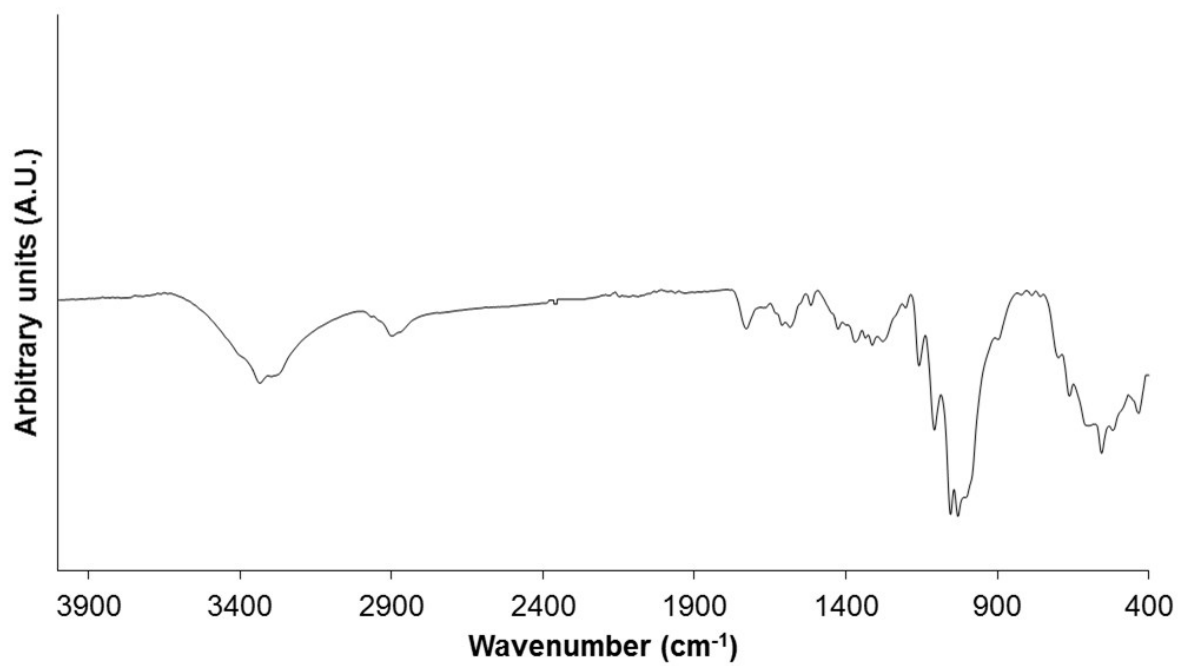

**Fig. S3** FTIR spectra of **Cell-TERb**.

## 2. NMR spectra

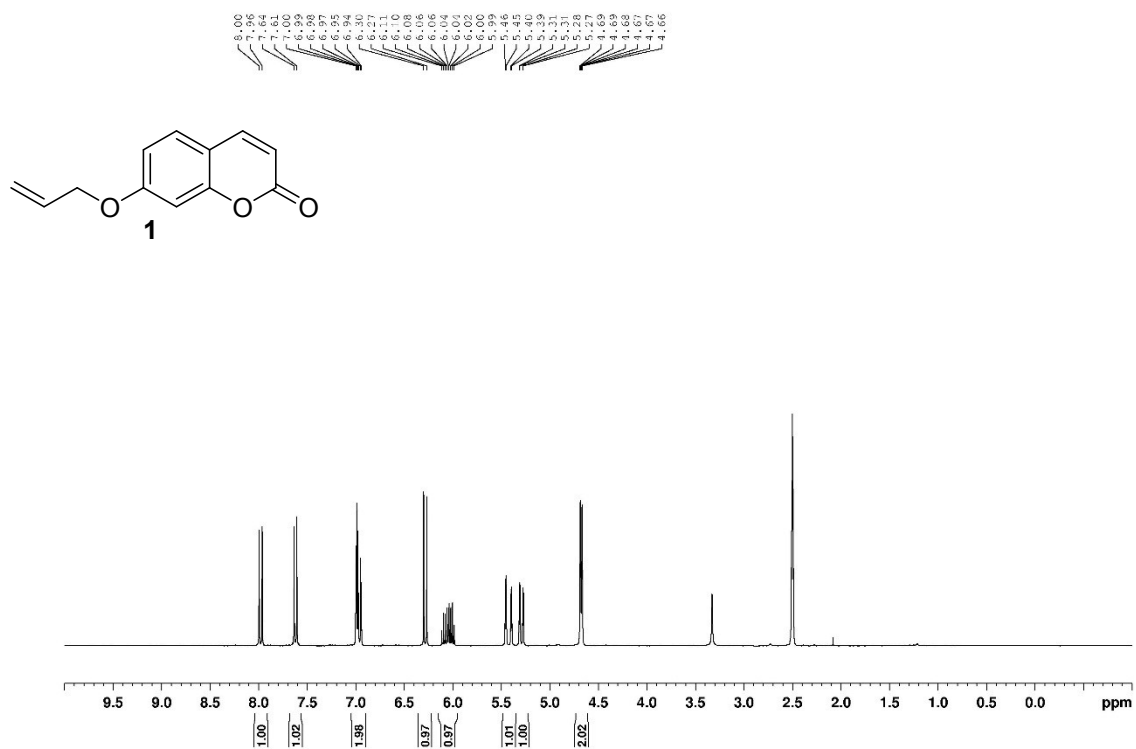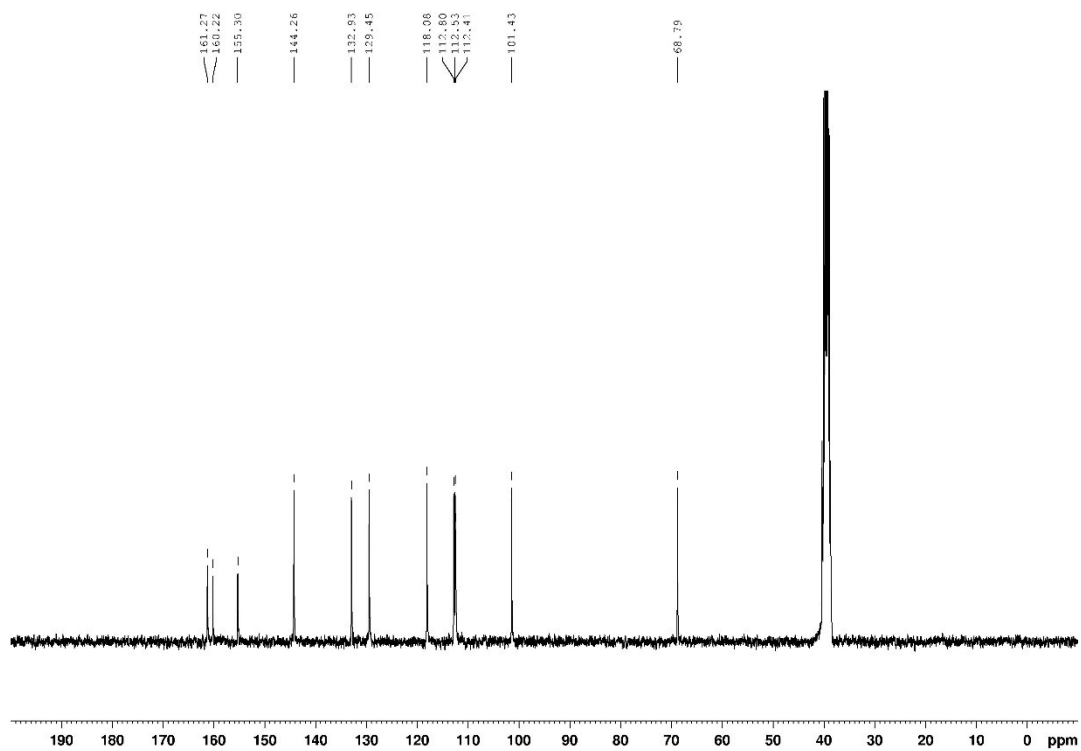

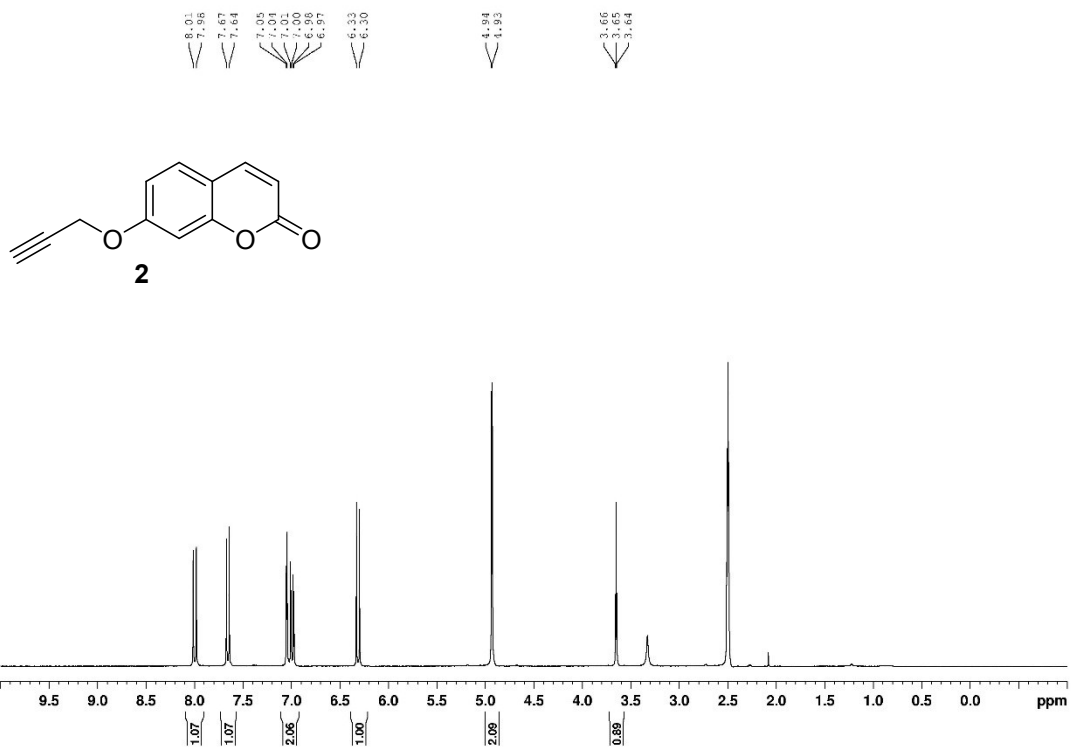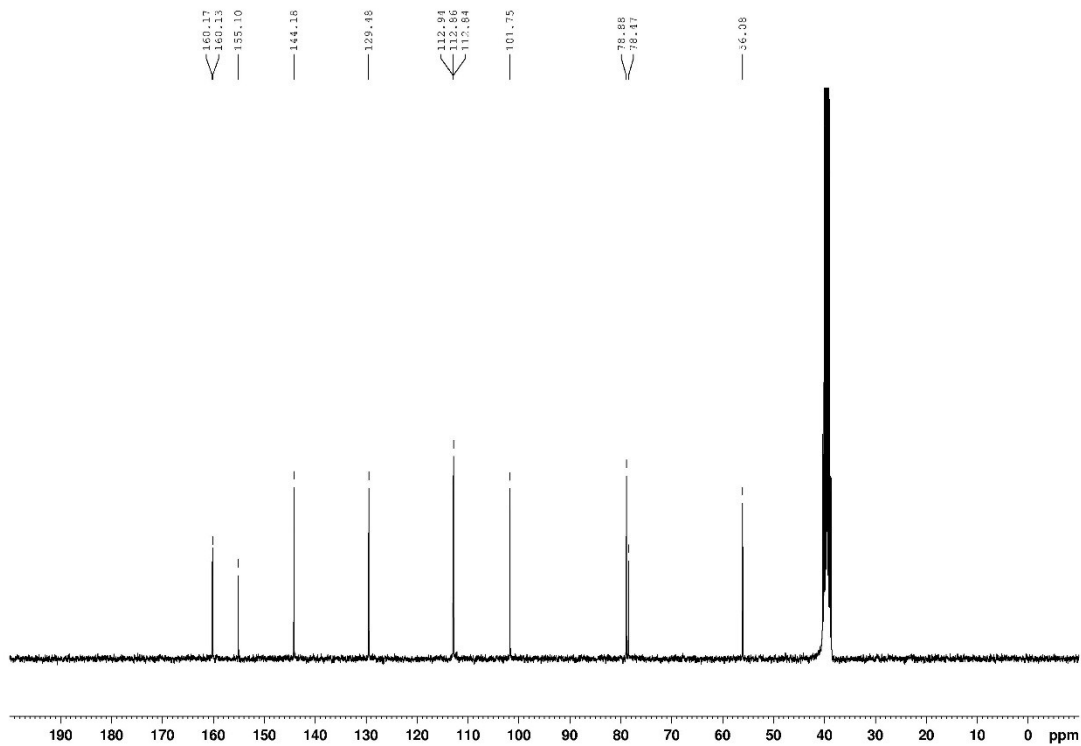

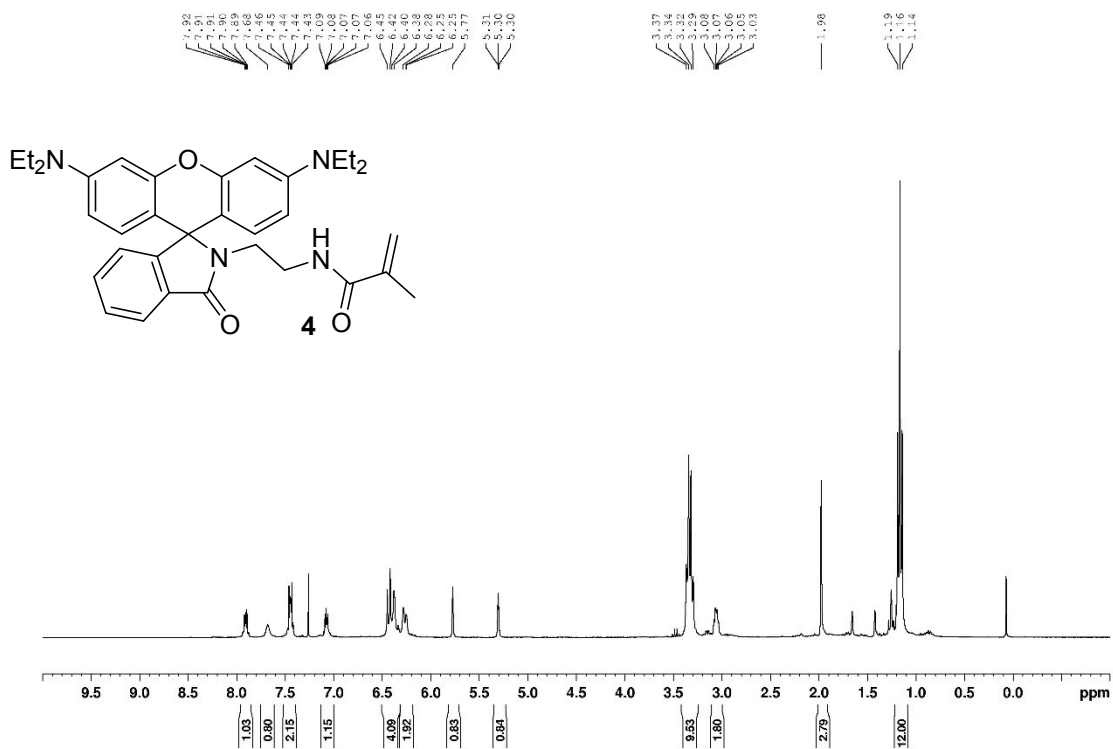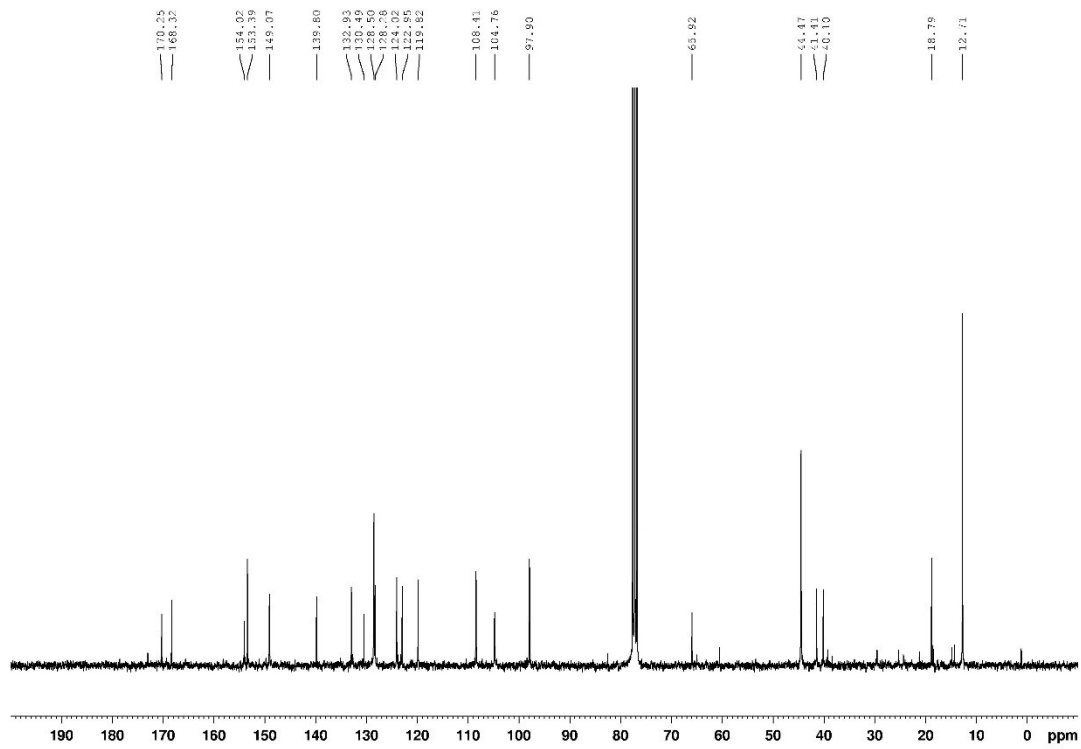

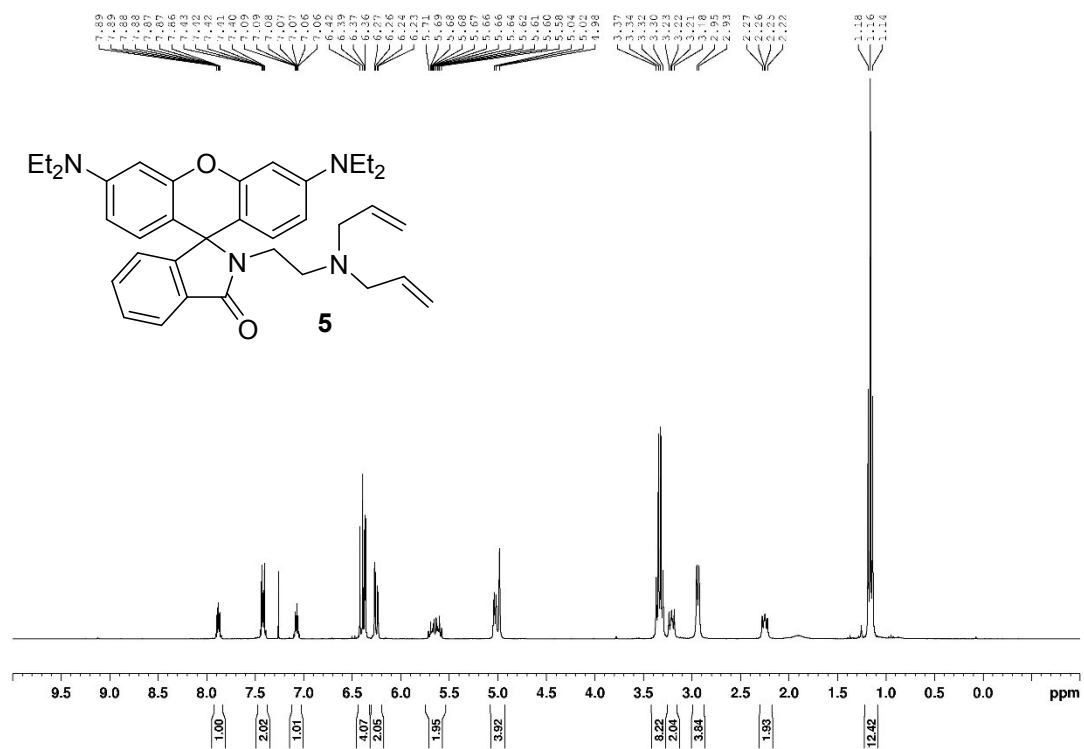

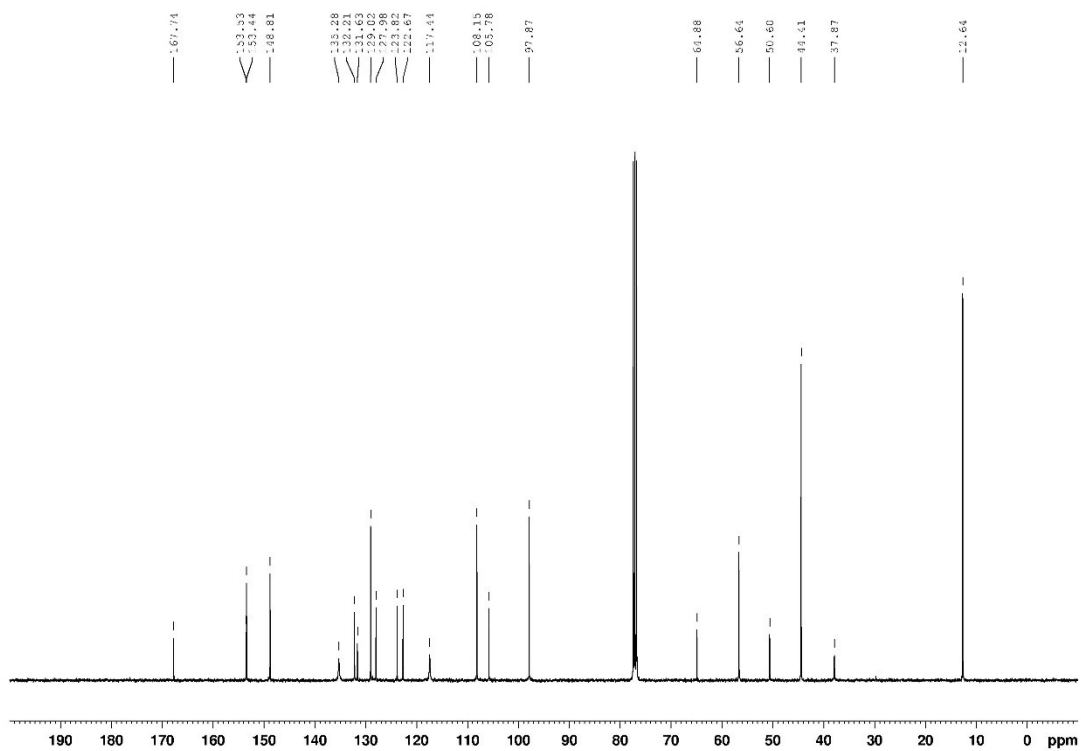

Supplement: c7tc01081h1.pdf [file c7tc01081h1.pdf]
